# Supplementary material
Source: PubMed Central journal article supplement (PMC1693819)

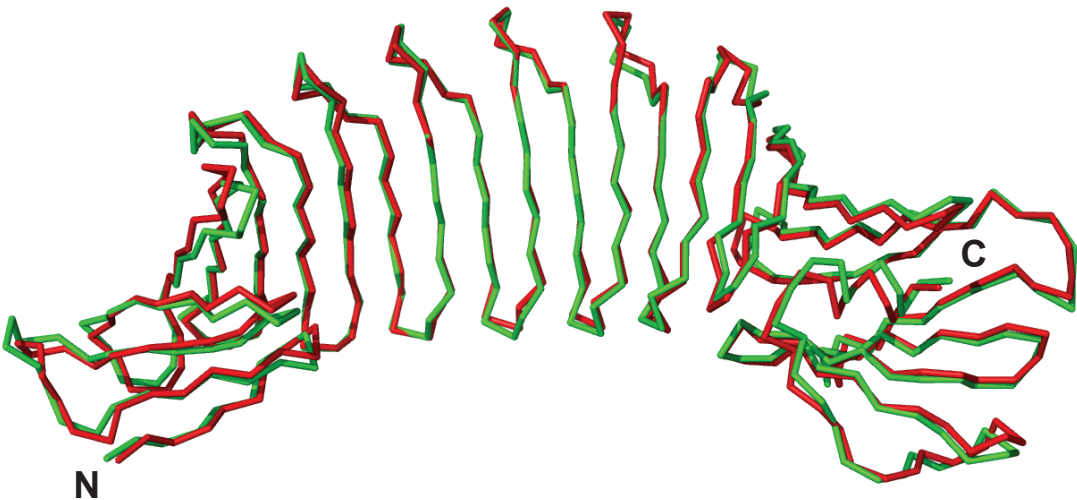

Supplement: pnas_0606690103_1.pdf [file pnas_0606690103_1.pdf]

**A**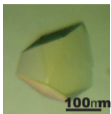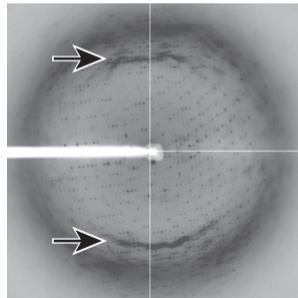**B**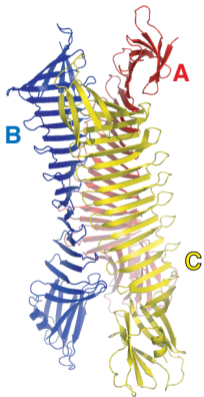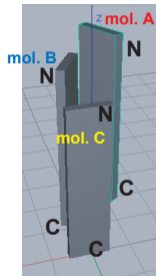**C**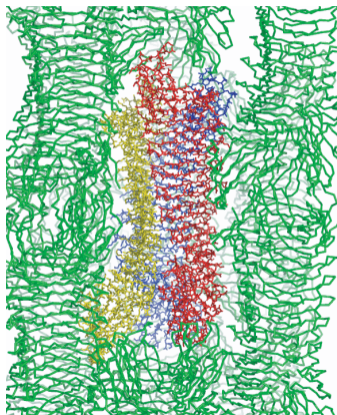

Supplement: pnas_0606690103_2.pdf [file pnas_0606690103_2.pdf]

A.  $\phi(\phi)$ 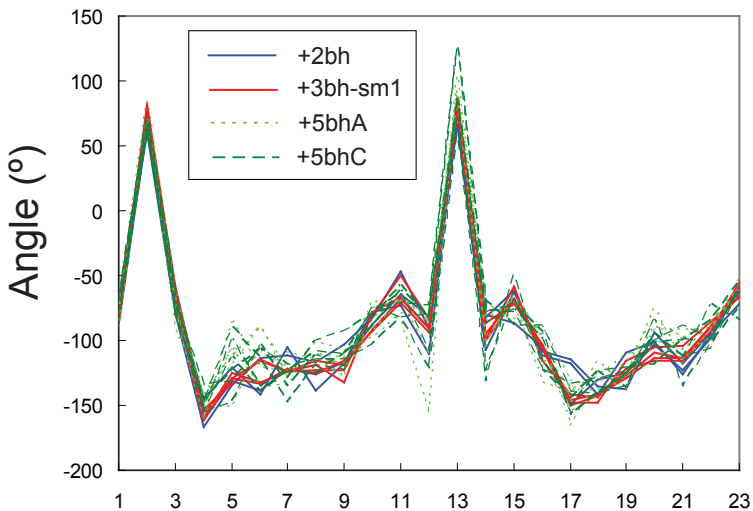B.  $\psi(\varphi)$ 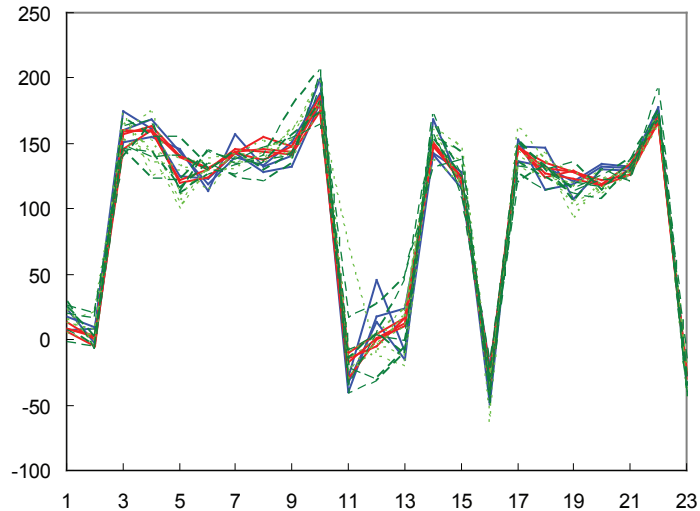

Residue number

Supplement: pnas_0606690103_3.pdf [file pnas_0606690103_3.pdf]

### A. wild type

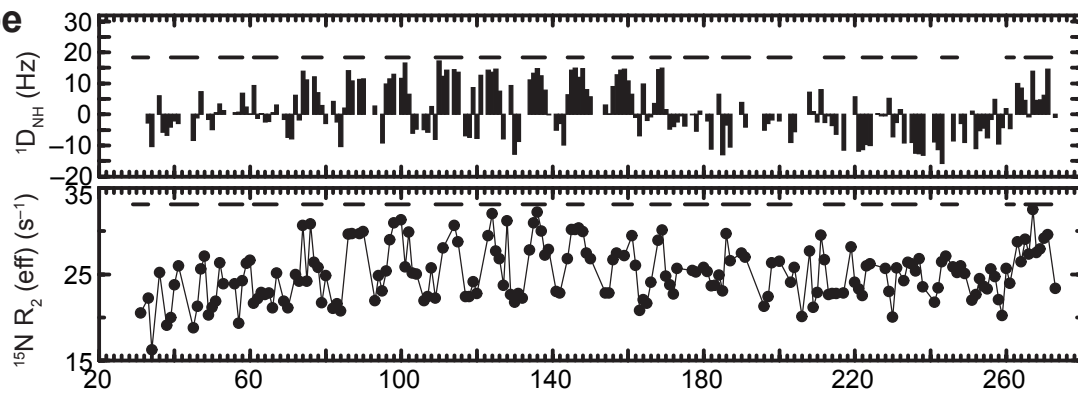

### B. OspA+1bh

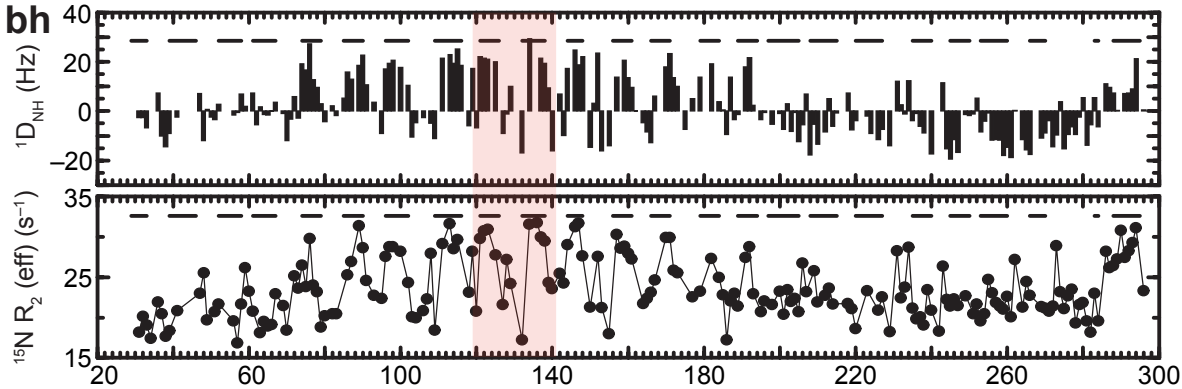

### C. OspA+2bh

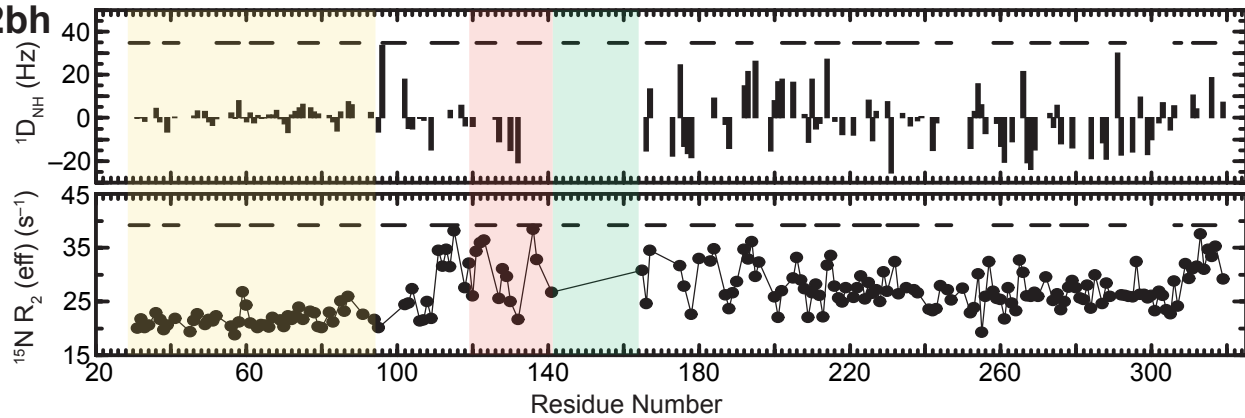

Supplement: pnas_0606690103_4.pdf [file pnas_0606690103_4.pdf]

**A**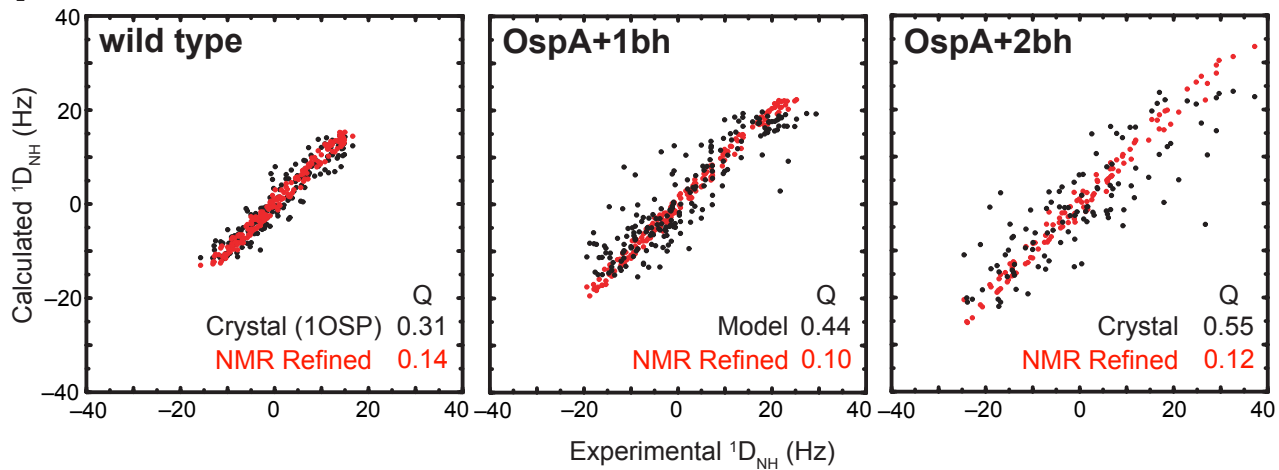**B**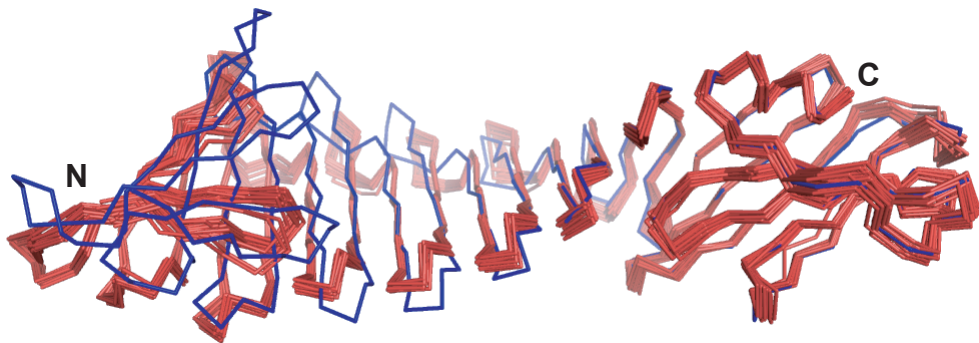

Supplement: pnas_0606690103_5.pdf [file pnas_0606690103_5.pdf]
